# Supplementary material for: Detection of congestive heart failure by Doppler echocardiography in cats with hypertrophic cardiomyopathy
Source: PubMed Central journal article supplement — J Vet Intern Med. 2020 May 4;34(3):1091–101. doi: 10.1111/jvim.15777 (PMC7255654; doi:10.1111/jvim.15777), 2020-05-04
Supplement: JVIM-34-1091-s001.pdf [file JVIM-34-1091-s001.pdf]

## Appendix

### Evaluation of radiographic congestive heart failure score

| Variable                                                | Assessment              | Score |
|---------------------------------------------------------|-------------------------|-------|
| Cardiomegaly (VHS)*                                     | None (<8.1)             | 0     |
|                                                         | Mild/Moderate (8.1-9.3) | 1     |
|                                                         | Severe (>9.3)           | 2     |
| Pulmonary vessel engorgement <sup>#</sup>               | None                    | 0     |
|                                                         | Present                 | 2     |
| Pulmonary infiltrates compatible with cardiogenic edema | None                    | 0     |
|                                                         | Equivocal               | 2     |
|                                                         | Present                 | 3     |
| Pleural effusion                                        | None                    | 0     |
|                                                         | Equivocal               | 2     |
|                                                         | Present                 | 3     |
| Distention of the caudal vena cava                      | None                    | 0     |
|                                                         | Present                 | 2     |
| Final assessment                                        | Total score:            |       |

\* , vertebral heart score (VHS) was determined and chambers enlarged documented.

<sup>#</sup> , vessels enlarged were documented (arteries, veins, both).

A total score of > 2 indicated presence of congestive heart failure.
